# Supplementary material for: Adjusted Troponin I for Improved Evaluation of Patients with Chest Pain
Source: Sci Rep. 2018 May 24;8:8087. doi: 10.1038/s41598-018-26120-1 (PMC5967336; doi:10.1038/s41598-018-26120-1)
Supplement: Supplementary file 1 — Supplementary tables [file 41598_2018_26120_MOESM1_ESM.docx]

**Supplementary Information**

**For**

**Adjusted Troponin I for Improved Evaluation of Patients with Chest Pain**

Jes-Niels Boeckel1,2,3,4, Lars Palapies1, Jens Klotsche5, Tanja Zeller2,11, Beatrice von Jeinsen1,2, Maya F. Perret1, Soeren L. Kleinhaus3, Lars Pieper5, Stergios Tzikas6,12, David Leistner1,2, Christoph Bickel13, Günter K Stalla7, Hendrik Lehnert8, Bertil Lindahl15, Hans-Ulrich Wittchen5, Sigmund Silber9, Stephan Baldus11,14, Winfried Maerz10, Stefanie Dimmeler2,3, Stefan Blankenberg2,11, Thomas Münzel2,12, Andreas M. Zeiher1,2, Till Keller1,2,16

1 Department of Internal Medicine III, Cardiology, University Hospital, Goethe University Frankfurt, Frankfurt, Germany

2 German Center for Cardiovascular Disease (DZHK), Berlin, Germany

3 Institute of Cardiovascular Regeneration, Centre for Molecular Medicine, Goethe University Frankfurt, Frankfurt, Germany

4 Department of Internal Medicine, Cardiology, University Hospital Leipzig, Leipzig, Germany

5 Clinical Psychology und Psychotherapy, Technical University Dresden, Dresden, Germany

6 3rd Department of Cardiology, Ippokrateio Hospital, Aristotle University of Thessaloniki, Thessaloniki, Greece

7 Max­ Plank­ Institute for Psychiatry, Neuroendocrinology, Munich, Munich, Germany

8 Department of Internal Medicine I, University Hospital Schleswig­-Holstein, Lübeck, Germany

9 Praxisklinik, Kardiologische Gemeinschaftspraxis, Munich, Germany

10 Synlab Akademie für ärztliche Fortbildung, Synlab Services GmbH, Mannheim, Germany

11 Clinic for General and Interventional Cardiology, University Heart Centre Hamburg, Hamburg, Germany.

12 Department of Medicine II, University Medical Center, Johannes Gutenberg University, Mainz, Germany

13 Department of Internal Medicine, Federal Armed Forces Hospital, Koblenz, Germany

14 Heart Center, University of Cologne, Cologne, Germany

15 Department of Medical Sciences and Uppsala Clinical Research Center, Uppsala, Sweden

16 Kerckhoff Heart and Thorax Center, Bad Nauheim, Germany

Address for correspondence:

Till Keller, MD

Department of Cardiology

Kerckhoff Heart and Thorax Center

Benekestrasse 2-8, 61231 Bad Nauheim, Germany

E-Mail: keller@chestpain.de

**Supplementary Table 1:** **Correlations of age and eGFR, with Troponin I in the derivation cohort (DETECT) in males**.

| **Males** | **Age** | | **eGFR** | | **Troponin I** | |
| --- | --- | --- | --- | --- | --- | --- |
|  | **rs** | **p-value** | **rs** | **p-value** | **rs** | **p-value** |
| Age |  |  | -0.282 | < 0.001 | 0.436 | < 0.001 |
| eGFR | -0.282 | < 0.001 |  |  | -0.142 | < 0.001 |
| Troponin I | 0.436 | < 0.001 | -0.142 | < 0.001 |  |  |

Spearman correlation coefficients (rs) with corresponding p-values between the parameters age, eGFR (estimated glomerular filtration rate) and Troponin I in the male (1746 individuals) subcohorts of the derivation (DETECT [Diabetes Cardiovascular Risk Evaluation Targets and Essential Data for Commitment of Treatment]) cohort.

**Supplementary Table 2:** **Correlations of age and eGFR, with troponin in the derivation cohort (DETECT) in females**.

| **Females** | **Age** | | **eGFR** | | **Troponin I** | |
| --- | --- | --- | --- | --- | --- | --- |
|  | **rs** | **p-value** | **rs** | **p-value** | **rs** | **p-value** |
| Age |  |  | -0.346 | < 0.001 | 0.518 | < 0.001 |
| eGFR | -0.346 | < 0.001 |  |  | -0.207 | < 0.001 |
| Troponin I | 0.518 | < 0.001 | -0.207 | < 0.001 |  |  |

Spearman correlation coefficients (rs) with corresponding p-values between the parameters age, eGFR (estimated glomerular filtration rate) and Troponin I in the female (2841 individuals) subcohorts of the derivation (DETECT [Diabetes Cardiovascular Risk Evaluation Targets and Essential Data for Commitment of Treatment]) cohort.

**Supplementary Table 3:** **Correlations of age and eGFR, with adjusted Troponin I in the derivation cohort (DETECT) in males**.

| **Males** | **Age** | | **eGFR** | | **Adjusted**  **Troponin I** | |
| --- | --- | --- | --- | --- | --- | --- |
|  | **r** | **p-value** | **r** | **p-value** | **r** | **p-value** |
| Age |  |  | -0.282 | < 0.001 | 0 | 1 |
| eGFR | -0.282 | < 0.001 |  |  | 0 | 1 |
| Adjusted Troponin I | 0 | 1 | 0 | 1 |  |  |

Spearman correlation coefficients (rs) with corresponding p-values between the parameters age, eGFR (estimated glomerular filtration rate) and adjusted Troponin I in the male (1746 individuals) subcohorts of the DETECT (Diabetes Cardiovascular Risk Evaluation Targets and Essential Data for Commitment of Treatment) cohort.

**Supplementary Table 4:** **Correlations of age and eGFR, with adjusted Troponin I in the derivation cohort (DETECT) in females**.

| **Females** | **Age** | | **eGFR** | | **Adjusted**  **Troponin I** | |
| --- | --- | --- | --- | --- | --- | --- |
|  | **r** | **p-value** | **r** | **p-value** | **r** | **p-value** |
| Age |  |  | -0.346 | < 0.001 | 0 | 1 |
| eGFR | -0.346 | < 0.001 |  |  | 0 | 1 |
| Adjusted Troponin I | 0 | 1 | 0 | 1 |  |  |

Spearman correlation coefficients (rs) with corresponding p-values between the parameters age, eGFR (estimated glomerular filtration rate) and adjusted Troponin I in the female (2841 individuals with unadjusted and.2839 individuals with adjusted Troponin I (two missing females due to lack of eGFR information) subcohorts of the DETECT (Diabetes Cardiovascular Risk Evaluation Targets and Essential Data for Commitment of Treatment) cohort.

**Supplementary Table 5:** **Correlations of age and eGFR, with Troponin I in the application cohort (StenoCardia) in males**.

| **Males** | **Age** | | **eGFR** | | **Troponin I** | |
| --- | --- | --- | --- | --- | --- | --- |
|  | **rs** | **p-value** | **rs** | **p-value** | **rs** | **p-value** |
| Age | 1 | 0 | -0.437 | <0.001 | 0.254 | <0.001 |
| eGFR | -0.437 | <0.001 | 1 | 0 | -0.123 | <0.001 |
| Troponin I | 0.254 | <0.001 | -0.123 | <0.001 | 1 | 0 |

Spearman correlation coefficients (rs) with corresponding p-values between the parameters age, eGFR (estimated glomerular filtration rate) and Troponin I in the male (1208 individuals) subcohorts of the StenoCardia cohort.

**Supplementary Table 6:** **Correlations of age and eGFR, with troponin in the application cohort (StenoCardia) in females**.

| **Females** | **Age** | | **eGFR** | | **Troponin I** | |
| --- | --- | --- | --- | --- | --- | --- |
|  | **rs** | **p-value** | **rs** | **p-value** | **rs** | **p-value** |
| Age | 1 | 0 | -0.457 | <0.001 | 0.202 | <0.001 |
| eGFR | -0.457 | <0.001 | 1 | 0 | -0.210 | <0.001 |
| Troponin I | 0.202 | <0.001 | -0.210 | <0.001 | 1 | 0 |

Spearman correlation coefficients (rs) with corresponding p-values between the parameters age, eGFR (estimated glomerular filtration rate) and Troponin I in the female (610 individuals) subcohorts of the StenoCardia cohort .

**Supplementary Table 7:** **Correlations of age and eGFR, with adjusted Troponin I in the application cohort (StenoCardia) in males**.

| **Males** | **Age** | | **eGFR** | | **Adjusted**  **Troponin I** | |
| --- | --- | --- | --- | --- | --- | --- |
|  | **r** | **p-value** | **r** | **p-value** | **r** | **p-value** |
| Age | 1 | 0 | -0.437 | <0.001 | 0.018 | 0.534 |
| eGFR | -0.437 | <0.001 |  | 0 | 0.018 | 0.538 |
| Adjusted Troponin I | 0.018 | 0.534 | 0.018 | 0.538 | 1 | 0 |

Spearman correlation coefficients (rs) with corresponding p-values between the parameters age, eGFR (estimated glomerular filtration rate) and adjusted Troponin I in the male (1208 individuals) subcohorts of the StenoCardia cohort.

**Supplementary Table 8:** **Correlations of age and eGFR, with adjusted Troponin I in the application cohort (StenoCardia) in females**.

| **Females** | **Age** | | **eGFR** | | **Adjusted**  **Troponin I** | |
| --- | --- | --- | --- | --- | --- | --- |
|  | **r** | **p-value** | **r** | **p-value** | **r** | **p-value** |
| Age | 1 | 0 | -0.457 | <0.001 | -0.041 | 0.313 |
| eGFR | -0.457 | <0.001 | 1 | 0 | -0.078 | <0.001 |
| Adjusted Troponin I | -0.041 | 0.313 | -0.078 | <0.001 | 1 | 0 |

Spearman correlation coefficients (rs) with corresponding p-values between the parameters age, eGFR (estimated glomerular filtration rate) and adjusted Troponin I in the female (610 individuals) subcohorts of the StenoCardia cohort.

**Supplementary Table 9:** **Performance measures for the diagnostic threshold of Troponin I for the detection of AMI in the application (StenoCardia) cohort to compare measured Troponin I values and adjusted Troponin I values in respect to age in females and males**.

| **AMI vs. non-AMI** | **Sensitivity** | **Specificity** | **PPV** | **NPV** |
| --- | --- | --- | --- | --- |
| **Males** | | | | |
| Age > 70 years |  | | | |
| Troponin I | 0.96 ( 0.9 , 0.99 ) | 0.84 ( 0.79 , 0.89 ) | 0.73 ( 0.65 , 0.81 ) | 0.98 ( 0.95 , 0.99 ) |
| Adjusted Troponin I | 0.78 ( 0.69 , 0.86 ) | 0.96 ( 0.92 , 0.98 ) | 0.89 ( 0.81 , 0.95 ) | 0.91 ( 0.86 , 0.94 ) |
| Age ≤ 70 years |  | | | |
| Troponin I | 0.9 ( 0.85 , 0.93 ) | 0.89 ( 0.87 , 0.92 ) | 0.73 ( 0.67 , 0.78 ) | 0.96 ( 0.95 , 0.98 ) |
| Adjusted Troponin I | 0.85 ( 0.8 , 0.9 ) | 0.91 ( 0.88 , 0.93 ) | 0.74 ( 0.68 , 0.8 ) | 0.95 ( 0.93 , 0.97 ) |
| **Females** | | | | |
| Age > 70 years |  | | | |
| Troponin I | 0.84 ( 0.68 , 0.94 ) | 0.87 ( 0.8 , 0.91 ) | 0.58 ( 0.44 , 0.72 ) | 0.96 ( 0.91 , 0.98 ) |
| Adjusted Troponin I | 0.84 ( 0.68 , 0.94 ) | 0.93 ( 0.88 , 0.97 ) | 0.74 ( 0.58 , 0.86 ) | 0.96 ( 0.92 , 0.99 ) |
| Age ≤ 70 years |  | | | |
| Troponin I | 0.9 ( 0.79 , 0.96 ) | 0.89 ( 0.85 , 0.92 ) | 0.59 ( 0.48 , 0.69 ) | 0.98 ( 0.96 , 0.99 ) |
| Adjusted Troponin I | 0.91 ( 0.81 , 0.97 ) | 0.88 ( 0.84 , 0.91 ) | 0.56 ( 0.46 , 0.67 ) | 0.98 ( 0.96 , 0.99 ) |

Performance measures with 95% confidence intervals for the diagnostic threshold of Troponin I (0.04 ng/mL) for the detection of AMI (acute myocardial infarction) in the StenoCardia cohort (n=1789 (Patients with Troponin I vaues available), for adjusted Troponin I subset with eGFR: n=1780) to compare measured Troponin I values and adjusted Troponin I values. The patients have been grouped by gender and age. Acronyms: PPV = positive predictive value, NPV = negative predictive value.

**Supplementary Table 10:** **Performance measures for the diagnostic threshold of Troponin I for the detection of AMI in the application (StenoCardia) cohort to compare measured Troponin I values and adjusted Troponin I values in respect to eGFR in females and males**.

| **AMI vs. non-AMI** | **Sensitivity** | | **Specificity** | **PPV** | **NPV** |
| --- | --- | --- | --- | --- | --- |
| **Males** | | | | | |
| eGFR ≥ 60 mL/min/1.73m2 | |  | | | |
| Troponin I | | 0.91 (0.86, 0.94 ) | 0.89 ( 0.86 , 0.91 ) | 0.73 ( 0.67 , 0.77 ) | 0.97 ( 0.95 , 0.98 ) |
| Adjusted Troponin I | | 0.82 (0.77 , 0.87 ) | 0.91 ( 0.89 , 0.93 ) | 0.76 ( 0.7 , 0.81 ) | 0.94 ( 0.92 , 0.96 ) |
| eGFR < 60 mL/min/1.73m2 | |  | | | |
| Troponin I | | 0.96 ( 0.87 , 1 ) | 0.83 ( 0.74 , 0.9 ) | 0.75 ( 0.63 , 0.85 ) | 0.98 ( 0.92 , 1 ) |
| Adjusted Troponin I | | 0.87 ( 0.75 , 0.95 ) | 0.95 ( 0.89 , 0.98 ) | 0.9 ( 0.79 , 0.97 ) | 0.93 ( 0.86 , 0.97 ) |
| **Females** | | | | | |
| eGFR ≥ 60 mL/min/1.73m2 | |  | | | |
| Troponin I | | 0.88 (0.77, 0.95) | 0.91 (0.88, 0.93) | 0.59 (0.48, 0.69) | 0.98 (0.96, 0.99) |
| Adjusted Troponin I | | 0.88 (0.77, 0.95) | 0.91 (0.87, 0.93) | 0.58 (0.47, 0.69) | 0.98 (0.96, 0.99) |
| eGFI < 60 mL/min/1.73m2 | |  | | | |
| Troponin I | | 0.89 (0.74, 0.97) | 0.77 (0.68, 0.85) | 0.57 (0.43, 0.7) | 0.95 (0.89, 0.99) |
| Adjusted Troponin I | | 0.89 (0.74, 0.97) | 0.86 (0.78, 0.92) | 0.68 (0.53, 0.81) | 0.96 (0.9, 0.99) |

Performance measures with 95% confidence intervals for the diagnostic threshold of Troponin I (0.04 ng/mL) for the detection of AMI (acute myocardial infarction) in the StenoCardia cohort (n=1780 (patients with Troponin I, eGFR)) to compare measured Troponin I values and adjusted Troponin I values. The patients have been grouped by gender and renal function given by eGFR. Acronyms: eGFR = estimated glomerular filtration rate, PPV = positive predictive value, NPV = negative predictive value.

**Supplementary Table 11:** **Performance measures for the diagnostic threshold of Troponin I for the detection of AMI in the application (StenoCardia) cohort to compare measured Troponin I values and adjusted Troponin I values in respect to age in females and males**.

|  |  | **Final medical diagnosis** | **AMI** | | **Non-AMI** | |
| --- | --- | --- | --- | --- | --- | --- |
|  |  |  | Diagnosis based on **not adjusted** Troponin I values | | | |
| **Males** |  |  | AMI | Non-AMI | AMI | Non-AMI |
| **age ≤ 56 years** | Diagnosis based on **adjusted** Troponin I values | AMI | 78 | 0 | 37 | 8 |
| Non-AMI | 0 | 14 | 2 | 315 |
| **56 years < age ≤ 69 years** | AMI | 97 | 0 | 17 | 0 |
| Non-AMI | 8 | 7 | 9 | 253 |
| **69 years < age** | AMI | 81 | 0 | 10 | 0 |
| Non-AMI | 18 | 5 | 29 | 199 |

Performance measures with 95% confidence intervals for the diagnostic threshold of Troponin I (0.04 ng/mL) for the detection of AMI (acute myocardial infarction) in the StenoCardia cohort (n=1789 (Patients with Troponin I vaues available), for adjusted Troponin I subset with eGFR: n=1780) to compare measured Troponin I values and adjusted Troponin I values. The patients have been grouped by gender and age. Acronyms: PPV = positive predictive value, NPV = negative predictive value.

**Supplementary Table 12:** **Diagnostic reclassification in age-groups of females based on Troponin I (by the threshold of 40 ng/L) before (original values) and after adjustment of Troponin I.**

|  |  | **Final medical diagnosis** | **AMI** | | **Non-AMI** | |
| --- | --- | --- | --- | --- | --- | --- |
|  |  |  | Diagnosis based on **not adjusted** Troponin I values | | | |
| **Females** |  |  | AMI | Non-AMI | AMI | Non-AMI |
| **age ≤ 56 years** | Diagnosis based on **adjusted** Troponin I values | AMI | 22 | 1 | 12 | 6 |
| Non-AMI | 0 | 0 | 0 | 124 |
| **56 years < age ≤ 69 years** | AMI | 28 | 0 | 20 | 0 |
| Non-AMI | 0 | 3 | 3 | 152 |
| **69 years < age** | AMI | 33 | 0 | 14 | 0 |
| Non-AMI | 1 | 7 | 11 | 156 |

Diagnostic reclassification in age-groups of females based on Troponin I (by the threshold of 40ng/L) before (original values) and after adjustment of Troponin I in the StenoCardia cohort (n=593 (females with Troponin I, eGFR available)) with all necessary parameters available to apply the adjustment model (Troponin I, age, gender, Creatinine), partitioned into 3 subgroups defined by whole cohort age tertiles (≤56 years, between 56 and 69 years, > 69 years). Each patient appears in the count of exactly one cell, regards to diagnosis before (column) and after (row) adjustment. The true disease status is AMI (columns 1-2) or Non-AMI (columns 3-4). Acronyms: AMI = Acute myocardial infarction.
